# Supplementary material for: Gene expression profiling of pre-eclamptic placentae by RNA sequencing
Source: PubMed Central journal article supplement (PMC4585671; doi:10.1038/srep14107), 2015-09-21

# Gene expression profiling of pre-eclamptic placentae by RNA sequencing

Tea Kaartokallio<sup>1\*</sup>, Alejandra Cervera<sup>2</sup>, Anjuska Kyllönen<sup>1</sup>, Krista Laivuori<sup>1,3,4</sup>, Juha Kere<sup>3,4,5</sup>,  
Hannele Laivuori<sup>1,6,7</sup>, The FINNPEC Core Investigator Group

1 Medical Genetics, University of Helsinki and Helsinki University Hospital, Helsinki, FI-00014, Finland

2 Research Programs Unit, Genome-Scale Biology and Institute of Biomedicine, University of Helsinki, Helsinki, FI-00014, Finland

3 Molecular Neurology Research Program, University of Helsinki, Helsinki, FI-00014, Finland

4 Folkhälsan Institute of Genetics, Helsinki, FI-000290, Finland

5 Department of Biosciences and Nutrition, Center for Innovative Medicine, and Science for Life Laboratory, Karolinska Institutet, Stockholm, Sweden

6 Obstetrics and Gynaecology, University of Helsinki and Helsinki University Hospital, University of Helsinki, Helsinki, FI-00014, Finland

7 Institute for Molecular Medicine Finland, University of Helsinki, Helsinki, FI-00014, Finland

\*tea.kaartokallio@helsinki.fi

Members of the FINNPEC Core Investigator Group:

Hannele Laivuori, Seppo Heinonen, Eero Kajantie, Juha Kere, Katja Kivinen, and Anneli Pouta

## SUPPLEMENTARY MATERIAL

**Supplementary Table S1.** Quality metrics for the RNA-seq data

| <b>Pool (F/R)</b> | <b>Read count before filtering</b> | <b>% of reads filtered</b> | <b>Read count*</b> | <b>Read length*</b> | <b>GC%*</b> | <b>Duplicate reads (%)*</b> |
|-------------------|------------------------------------|----------------------------|--------------------|---------------------|-------------|-----------------------------|
| PE 1_F            | 31211527                           | 1.6                        | 30701210           | 25-101              | 49          | 65.9                        |
| PE 1_R            | 31211527                           | 1.6                        | 30701210           | 25-101              | 49          | 65.3                        |
| PE 2_F            | 29927649                           | 1.9                        | 29358515           | 25-101              | 50          | 67.0                        |
| PE 2_R            | 29927649                           | 1.9                        | 29358515           | 25-90               | 50          | 64.6                        |
| PE 3_F            | 35701818                           | 1.6                        | 35129518           | 25-101              | 48          | 73.3                        |
| PE 3_R            | 35701818                           | 1.6                        | 35129518           | 25-90               | 48          | 71.1                        |
| Ctrl 1_F          | 32761025                           | 2.0                        | 32100295           | 25-101              | 49          | 69.2                        |
| Ctrl 1_R          | 32761025                           | 2.0                        | 32100295           | 25-94               | 49          | 66.9                        |
| Ctrl 2_F          | 30276310                           | 2.0                        | 29676081           | 25-101              | 49          | 69.9                        |
| Ctrl 2_R          | 30276310                           | 2.0                        | 29676081           | 25-90               | 49          | 67.7                        |
| Ctrl 3_F          | 39860949                           | 2.0                        | 39060015           | 25-101              | 48          | 73.6                        |
| Ctrl 3_R          | 39860949                           | 2.0                        | 39060015           | 25-90               | 48          | 71.4                        |

\*After read trimming and filtering

PE=pre-eclampsia, Ctrl=control, F=forward, R=reverse

**Supplementary Table S2.** Quality metrics for the Tophat alignment

| <b>Pool</b> | <b>Mapped reads</b> | <b>Mapped with mate</b> | <b>Mapped without mate</b> | <b>Mate mapped to different Chr*</b> | <b>Unique alignments (%)</b> |
|-------------|---------------------|-------------------------|----------------------------|--------------------------------------|------------------------------|
| PE1         | 59,423,667          | 55,851,614 (94.0%)      | 3,572,053 (6.0%)           | 629,972 (1.1%)                       | 92.1                         |
| PE2         | 59,182,860          | 55,509,582 (93.8%)      | 3,673,278 (6.2%)           | 680,992 (1.2%)                       | 90.1                         |
| PE3         | 71,275,870          | 67,655,152 (94.9%)      | 3,620,718 (5.1%)           | 767,588 (1.1%)                       | 91.3                         |
| Ctrl1       | 65,262,608          | 61,488,022 (94.2%)      | 3,774,586 (5.8%)           | 721,282 (1.2%)                       | 89.9                         |
| Ctrl2       | 60,435,844          | 56,941,186 (94.2%)      | 3,494,658 (5.8%)           | 622,024 (1.1%)                       | 89.8                         |
| Ctrl3       | 78,035,758          | 73,779,502 (94.5%)      | 4,256,256 (5.5%)           | 876,940 (1.2%)                       | 92.1                         |

\*count (percentage) of the reads that mapped with mate

PE=pre-eclampsia, Ctrl=control, Chr=chromosome

**Supplementary Table S6.** Diseases and functions annotations from functional IPA analysis.

| Category                                             | Examples of disease and function annotations within each category                                                                                                                                                                         | Number (%) of molecules in each category |               |              |
|------------------------------------------------------|-------------------------------------------------------------------------------------------------------------------------------------------------------------------------------------------------------------------------------------------|------------------------------------------|---------------|--------------|
|                                                      |                                                                                                                                                                                                                                           | All pools                                | W/o PE1       | W/o PE3      |
| <i>Hematological system development and function</i> | Activation of blood cells, binding of leucocytes, chemotaxis of monocytes, proliferation of immune cells, activation of antigen presenting cells, T cell migration, infiltration of leucocytes, differentiation of blood cells            | 84<br>(32.3)                             | 151<br>(33.0) | 67<br>(27.0) |
| <i>Immune cell trafficking</i>                       | Activation of leucocytes, chemotaxis of leucocytes, cell movement of phagocytes, recruitment of granulocytes, lymphocyte migration, NK cell migration                                                                                     | 62<br>(23.8)                             | 109<br>(23.8) | 52<br>(21.0) |
| <i>Cellular movement</i>                             | migration of cells, chemotaxis of cells, cell movement of leucocytes, cell movement of myeloid cells, cell movement of phagocytes, recruitment of granulocytes, migration of cancer cells                                                 | 70<br>(26.9)                             | 136<br>(29.7) | 63<br>(25.4) |
| <i>Cell-to-cell signaling and interaction</i>        | activation of cells, stimulation of cells, binding of blood cells, attraction of cells, intercellular communication, signal transduction, adhesion of immune cells                                                                        | 96<br>(36.9)                             | 131<br>(28.6) | 73<br>(29.4) |
| <i>Inflammatory response</i>                         | Activation of phagocytes, chemotaxis of mononuclear leucocytes, inflammation of organ, chemotaxis of neutrophils, cell movement of macrophages, inflammation of endothelial cells                                                         | 83<br>(31.9)                             | 148<br>(32.3) | 67<br>(27.0) |
| Cell death and survival                              | Killing of cells, cytolysis, cell death of immune cells, necrosis, apoptosis, cell survival, hemolysis                                                                                                                                    | 90<br>(34.6)                             | 157<br>(34.3) | 75<br>(30.2) |
| Immunological disease                                | Systemic autoimmune syndrome, systemic lupus erythematosus, insulin-dependent diabetes mellitus, allergy, Sjögren's syndrome                                                                                                              | 79<br>(30.4)                             | 126<br>(27.5) | 66<br>(26.6) |
| Cancer                                               | Metastatic carcinoma, metastatic endocrine gland tumor, advanced malignant tumor, ovarian neoplasia, growth of tumor, metastasis                                                                                                          | 177<br>(68.1)                            | 318<br>(69.4) | 72<br>(29.0) |
| Connective tissue disorders                          | arthritis, rheumatoid arthritis                                                                                                                                                                                                           | 61<br>(23.5)                             | 86<br>(18.8)  | 48<br>(19.4) |
| Inflammatory disease                                 | chronic inflammatory disorder, dermatitis, inflammatory bowel disease, asthma                                                                                                                                                             | 80<br>(30.8)                             | 132<br>(28.8) | 64<br>(25.8) |
| Cellular growth and proliferation                    | Stimulation of cells, proliferation of immune cells, proliferation of cells                                                                                                                                                               | 91<br>(35.0)                             | 175<br>(38.2) | 72<br>(29.0) |
| Tissue development                                   | Adhesion of blood cells, adhesion of epithelial cells, aggregation of cells, endothelial cell development, growth of epithelial tissue, detachment of epithelial cells, detachment of endothelial cells inflammation of endothelial cells | 66<br>(25.4)                             | 120<br>(26.2) | 46<br>(18.5) |
| Cell signaling                                       | mobilization of Ca <sup>2+</sup> , regulation of hormone, release of nitric oxide                                                                                                                                                         | 35<br>(13.5)                             | 68<br>(14.8)  | 34<br>(13.7) |
| Free radical scavenging                              | synthesis of reactive oxygen species, release of reactive oxygen species                                                                                                                                                                  | 28<br>(10.8)                             | 48<br>(10.5)  | 20<br>(8.1)  |
| Molecular transport                                  | flux of inorganic cation, flux of Ca <sup>2+</sup> , quantity of Ca <sup>2+</sup> , secretion of molecule                                                                                                                                 | 62<br>(23.8)                             | 104<br>(22.7) | 64<br>(25.8) |
| Cardiovascular                                       | vascular disease, disorder of artery, occlusion of                                                                                                                                                                                        | 34                                       | 80            | 29           |

|                                                |                                                                                                                                                                                                                                                                    |              |              |              |
|------------------------------------------------|--------------------------------------------------------------------------------------------------------------------------------------------------------------------------------------------------------------------------------------------------------------------|--------------|--------------|--------------|
| disease                                        | artery, atherogenesis, hemolytic uremic syndrome, atherosclerosis, vascular lesion, hypertension                                                                                                                                                                   | (13.1)       | (17.5)       | (11.7)       |
| Carbohydrate metabolism                        | neutralization of polysaccharide, hydrolysis of polysaccharide, synthesis of polysaccharide, hydrolysis of proteoglycan, quantity of heparin                                                                                                                       | 15<br>(5.8)  | 8 (1.7)      | 26<br>(10.5) |
| Cardiovascular system development and function | vascularization, development of blood vessel, angiogenesis, formation of endothelial tube, chemotaxis of endothelial cell lines, development of vascular system, adhesion of endothelial cells, migration of endothelial cells, proliferation of endothelial cells | 36<br>(13.8) | 68<br>(14.8) | 31<br>(12.5) |

The table shows the diseases and functions categories that had the largest number of statistically significant annotations in all the three subanalysis (in italics), and additional statistically significant categories selected. For each category, a few examples of annotations are shown. Each annotation might belong to several categories.

**Supplementary Table S8.** Quantitative PCR validation of 11 genes with altered expression in pre-eclamptic placentae in the RNA-seq. Diabetics have been excluded in this analysis.

| Gene                                                                   | Control vs. pre-eclampsia |                                       |                            | Term vs. preterm    |                                       |                            | Up/Down *         |
|------------------------------------------------------------------------|---------------------------|---------------------------------------|----------------------------|---------------------|---------------------------------------|----------------------------|-------------------|
|                                                                        | log <sub>2</sub> FC       | Permutation test p value <sup>1</sup> | ANOVA p value <sup>2</sup> | log <sub>2</sub> FC | Permutation test p value <sup>1</sup> | ANOVA p value <sup>2</sup> |                   |
| <b>Expression affected by pre-eclampsia status</b>                     |                           |                                       |                            |                     |                                       |                            |                   |
| <i>LEP</i>                                                             | 2.90                      | <b>&lt;0.001</b>                      | <b>0.001</b>               | 1.25                | 0.173                                 | 0.117                      | ↑                 |
| <i>HTRA4</i>                                                           | 1.86                      | <b>0.003</b>                          | <b>0.002</b>               | 1.99                | <b>&lt;0.001</b> <sup>3</sup>         | <b>0.005</b> <sup>3</sup>  | ↑                 |
| <i>SASH1</i>                                                           | 1.07                      | <b>&lt;0.001</b>                      | <b>0.007</b>               | 0.73                | 0.085                                 | 0.121                      | ↑                 |
| <i>CCSAP</i>                                                           | 0.57                      | <b>0.006</b>                          | <b>0.035</b>               | 0.15                | 0.490                                 | 0.467                      | ↑                 |
| <b>Expression affected by gestational age</b>                          |                           |                                       |                            |                     |                                       |                            |                   |
| <i>DEFA1/DEFA1B</i>                                                    | -1.21                     | 0.051                                 | 0.361                      | -1.71               | <b>0.007</b>                          | <b>0.001</b>               | ↓                 |
| <i>CGB</i>                                                             | 0.33                      | 0.399                                 | 0.635                      | 1.11                | <b>&lt;0.001</b>                      | <b>0.003</b>               | ↑                 |
| <i>LYZ</i>                                                             | 0.15                      | 0.640                                 | 0.291                      | -0.86               | <b>0.003</b>                          | <b>0.004</b>               | ↓                 |
| <i>FCGR3A</i>                                                          | -0.10                     | 0.623                                 | 0.902                      | -0.47               | <b>0.024</b>                          | <b>0.033</b>               | ↓                 |
| <i>LGALS14</i>                                                         | -0.48                     | <b>0.048</b>                          | 0.065                      | -0.57               | <b>0.019</b>                          | <b>0.042</b>               | ↓                 |
| <i>PLIN2</i>                                                           | 0.47                      | 0.094                                 | 0.148                      | 0.55                | <b>0.040</b>                          | <b>0.044</b>               | ↑                 |
| <b>Expression affected by pre-eclampsia status and gestational age</b> |                           |                                       |                            |                     |                                       |                            |                   |
| <i>TPBG</i>                                                            | 0.91                      | <b>&lt;0.001</b>                      | <b>0.008</b>               | 0.73                | <b>0.008</b>                          | <b>0.016</b>               | ↑ PE<br>↓ preterm |

After excluding diabetic patients from the analysis, the validation sample consists of 18 pre-eclamptic and 17 non-pre-eclamptic women, including 8 pre-eclamptic and 9 non-pre-eclamptic women from the RNA-seq.

\*in pre-eclamptic placenta compared to control placenta or in preterm placenta (gw<37+0) compared to term placenta (gw ≥ 37+0)

<sup>1</sup> Non-parametric permutation test conducted to compare control and pre-eclampsia, and term (gw ≥ 37+0) and preterm (gw<37+0) separately. Cq values normalised for geometric mean of reference genes and a calibrator ( $\Delta\Delta Cq$ ) were used in the analysis.

<sup>2</sup> Two-way ANOVA with categorical variables pre-eclampsia status (control/pre-eclampsia) and gestational age (<37+0/≥ 37+0). Log<sub>2</sub>  $\Delta\Delta Cq$  values were utilised in the analysis.

<sup>3</sup> Gestational age affects expression level only in the pre-eclamptic group

FC: fold change; gw: gestational week; PE: pre-eclampsia

**Supplementary Table S9.** Taqman assays and cDNA dilutions for target genes

| <b>Gene</b>               | <b>Taqman assay</b> | <b>cDNA dilution</b> |
|---------------------------|---------------------|----------------------|
| <i>FCGR3A</i>             | Hs02388314_m1       | 1:2                  |
| <i>CCSAP</i>              | Hs00299198_m1       | 1:5                  |
| <i>HTRA4</i>              | Hs01059836_m1       | 1:5                  |
| <i>LEP</i>                | Hs00174877_m1       | 1:5                  |
| <i>LYZ</i>                | Hs00426232_m1       | 1:5                  |
| <i>PLIN2</i>              | Hs00605340_m1       | 1:5                  |
| <i>SASH1</i>              | Hs01083311_m1       | 1:5                  |
| <i>TPBG</i>               | Hs00272649_s1       | 1:5                  |
| <i>CGB</i>                | Hs00361224_gH       | 1:10                 |
| <i>DEFA1/DEFA1B/DEFA3</i> | Hs00414018_m1       | 1:10                 |
| <i>LGALS14</i>            | Hs00944203_g1       | 1:10                 |
| <i>TBP*</i>               | Hs00427621_m1       | 1:2 / 1:5 / 1:10     |
| <i>YWHAZ*</i>             | Hs03044281_g1       | 1:2 / 1:5 / 1:10     |

\*Endogenous control gene

**Supplementary Figure S1.** The overlap in the genes with a  $\log_2$  fold change  $\geq 1$  or  $\leq -1$  between the subanalyses. PE= pre-eclampsia.

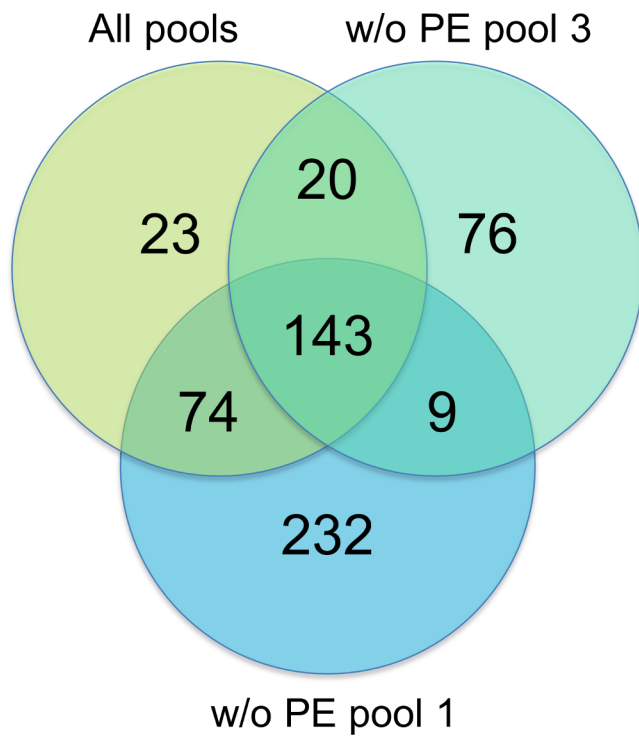

Supplement: srep14107-s1.pdf [file srep14107-s1.pdf]
